# Supplementary material for: WS2/Polyethylene Glycol Nanostructures for Ultra-Efficient MCF-7 Cancer Cell Ablation and Electrothermal Therapy
Source: PubMed Central journal article supplement — ACS Omega. 2022 Jun 27;7(27):23075–82. doi: 10.1021/acsomega.2c00284 (PMC9280949; doi:10.1021/acsomega.2c00284), 2022-06-27
Supplement: ao2c00284_si_001.pdf [file ao2c00284_si_001.pdf]

## Supporting Information

### **WS<sub>2</sub>/Polyethylene Glycol Nanostructures for Ultra-Efficient MCF-7 Cancer Cell Ablation and Electrothermal Therapy**

Maria Prisca Meivita,<sup>1</sup> Sophia S. Y. Chan,<sup>1</sup> Shao Xiang Go,<sup>1</sup> Denise Lee,<sup>1</sup> Natasa Bajalovic,<sup>1,\*</sup>  
Desmond K. Loke<sup>1,2,\*</sup>

<sup>1</sup>*Department of Science, Mathematics and Technology, Singapore University of Technology and Design,  
Singapore 487372, Singapore*

<sup>2</sup>*Office of Innovation, Changi General Hospital, Singapore, 529889, Singapore*

*\*Correspondence and requests for materials should be addressed to N.B. (email: natasa\_bajalovic@sutd.edu.sg) or D.K.L. (email: desmond\_loke@sutd.edu.sg)*

**Table S1.** Thermoelectric properties of the cell-layer/nanostructure model utilized in electrothermal simulations.

| Material         | Isotropic thermal conductivity (W/mK) | Isotropic resistivity ( $\Omega$ cm) |
|------------------|---------------------------------------|--------------------------------------|
| SiO <sub>2</sub> | 1.4                                   | 10 <sup>16</sup>                     |
| ITO              | 4                                     | 0.0001                               |
| PEG              | 0.285                                 | 104                                  |
| DMEM             | 0.6667                                | 59.52                                |
| Cell             | 0.6                                   | 136                                  |
| WS <sub>2</sub>  | 140                                   | 1.52                                 |

**Table S2.** Statistical significance analysis of MCF-7 and MCF-10A cytotoxicity at different concentrations (0 – 100  $\mu$ M) of (a) pure WS<sub>2</sub> and (b) WS<sub>2</sub>/PEG compared to control (cells only) and within two cell lines. Significance was set based on the Student's t-test and indicated as: \* ( $p < 0.05$ ), \*\* ( $p < 0.01$ ), \*\*\* ( $p < 0.001$ ), \*\*\*\* ( $p < 0.0001$ ). Non-significant results were unmarked.

| (a) WS <sub>2</sub> |                     | Concentrations ( $\mu$ M) |      |      |      |
|---------------------|---------------------|---------------------------|------|------|------|
|                     |                     | 25                        | 50   | 75   | 100  |
| MCF-7               | relative to control |                           | **** | **** | **** |
| MCF-10A             | relative to control |                           |      |      | *    |
| MCF-7               | relative to MCF-10A |                           | *    | **   | **   |

  

| (b) WS <sub>2</sub> /PEG |                     | Concentrations ( $\mu$ M) |    |    |     |
|--------------------------|---------------------|---------------------------|----|----|-----|
|                          |                     | 25                        | 50 | 75 | 100 |
| MCF-7                    | relative to control |                           |    |    | *   |
| MCF-10A                  | relative to control |                           |    |    |     |
| MCF-7                    | relative to MCF-10A |                           |    |    |     |

**Table S3.** References for Figure 4d.

| Ref No. | Reference                                                                                                                                                                                                                                                                           | Energy density<br>(J/ml) | Electric field<br>(kV/cm) |
|---------|-------------------------------------------------------------------------------------------------------------------------------------------------------------------------------------------------------------------------------------------------------------------------------------|--------------------------|---------------------------|
| 1       | Kumar, G.; Shelar, S.; Patel, A.; Roy, A.; Sarathi, R.; Singh, R.; Sharma, A. Investigation of Effect of Nanosecond Pulsed Electric Field on MCF-7 Breast Cancer Cells. <i>J. Drug Deliv. Ther.</i> <b>2021</b> , <i>11</i> (3), 43–49. DOI: 10.22270/jddt.v11i3.4827.              | 12.75                    | 18                        |
| 2       | Nuccitelli, R.; McDaniel, A.; Anand, S.; Cha, J.; Mallon, Z.; Berridge, J. C.; Uecker, D. Nano-Pulse Stimulation Is a Physical Modality That Can Trigger Immunogenic Tumor Cell Death. <i>J. Immunother. Cancer</i> <b>2017</b> , <i>5</i> (1), 32. DOI: 10.1186/s40425-017-0234-5. | 5                        | 12                        |

**Table S4.** References for Figure S5.

| Ref No. | Reference                                                                                                                                                                                                                                                                                                                                                            | Type of nanostructure               |
|---------|----------------------------------------------------------------------------------------------------------------------------------------------------------------------------------------------------------------------------------------------------------------------------------------------------------------------------------------------------------------------|-------------------------------------|
| 1       | Guan, G.; Wang, X.; Li, B.; Zhang, W.; Cui, Z.; Lu, X.; Zou, R.; Hu, J. “Transformed” Fe <sub>3</sub> S <sub>4</sub> Tetragonal Nanosheets: A High-Efficiency and Body-Clearable Agent for Magnetic Resonance Imaging Guided Photothermal and Chemodynamic Synergistic Therapy. <i>Nanoscale</i> <b>2018</b> , <i>10</i> (37), 17902–17911. DOI: 10.1039/C8NR06507A. | Fe <sub>3</sub> S <sub>4</sub> /PVP |
| 2       | Hao, J.; Song, G.; Liu, T.; Yi, X.; Yang, K.; Cheng, L.; Liu, Z. In Vivo Long-Term Biodistribution, Excretion, and Toxicology of PEGylated Transition-Metal Dichalcogenides MS <sub>2</sub> (M = Mo, W, Ti) Nanosheets. <i>Adv. Sci.</i> <b>2016</b> , <i>4</i> (1), 1600160. DOI: 10.1002/advs.201600160.                                                           | MoS <sub>2</sub> /PEG               |

**Table S5.** References for Figure S7.

---

| <b>Ref No.</b> | <b>Reference</b>                                                                                                                                                                                                                                                                                                                                          |
|----------------|-----------------------------------------------------------------------------------------------------------------------------------------------------------------------------------------------------------------------------------------------------------------------------------------------------------------------------------------------------------|
| 1              | Burford, C. D.; Bhattacharyya, K. D.; Boriraksantikul, N.; Whiteside, P. J. D.; Robertson, B. P.; Peth, S. M.; Islam, N. E.; Viator, J. A. Nanoparticle Mediated Thermal Ablation of Breast Cancer Cells Using a Nanosecond Pulsed Electric Field. <i>IEEE Trans. NanoBioscience</i> <b>2013</b> , <i>12</i> (2), 112–118. DOI: 10.1109/TNB.2013.2257836. |
| 2              | Mi, Y.; Li, P.; Liu, Q.; Xu, J.; Yang, Q.; Tang, J. Multi-Parametric Study of the Viability of in Vitro Skin Cancer Cells Exposed to Nanosecond Pulsed Electric Fields Combined With Multi-Walled Carbon Nanotubes. <i>Technol. Cancer Res. Treat.</i> <b>2019</b> , <i>18</i> , 1533033819876918. DOI: 10.1177/1533033819876918.                         |

---

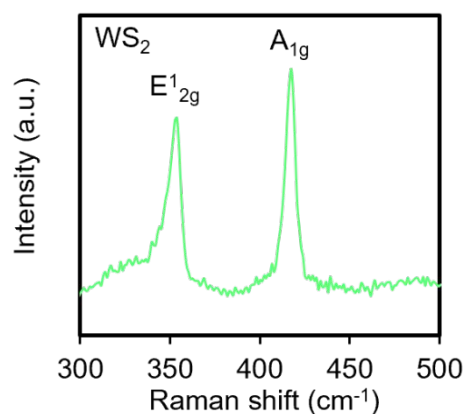

**Figure S1.** Raman spectra of pure WS<sub>2</sub>.

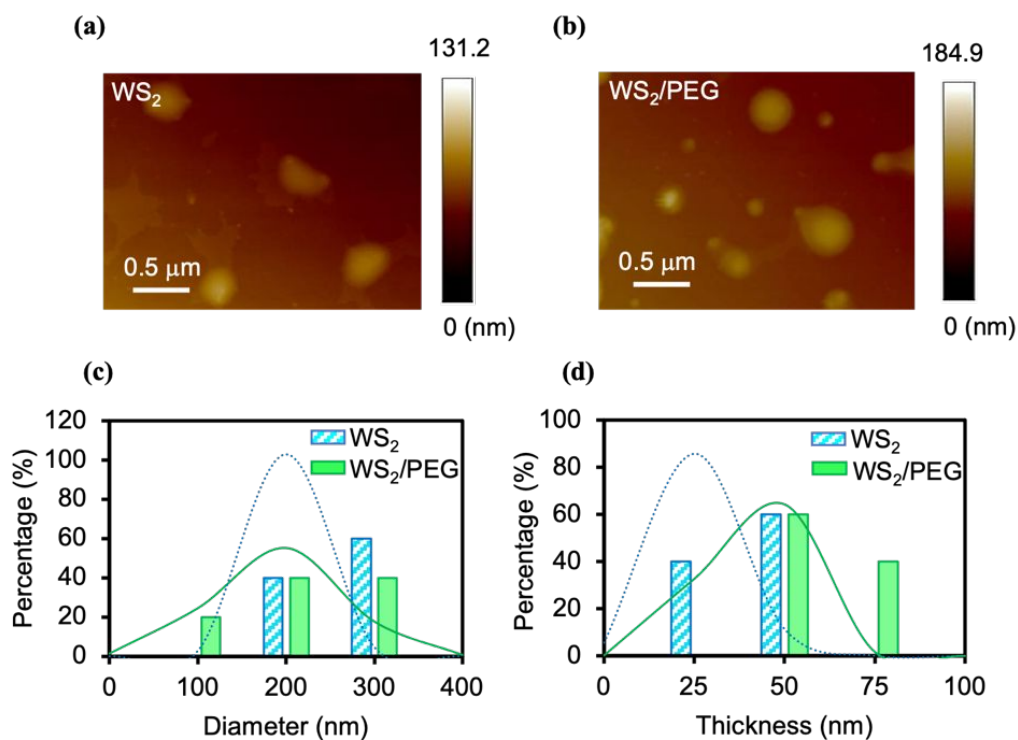

**Figure S2.** **a, b)** AFM images of a) pure WS<sub>2</sub> and b) WS<sub>2</sub>/PEG nanostructures. **c, d)** Diameter and thickness distributions of c) pure WS<sub>2</sub> and d) WS<sub>2</sub>/PEG nanostructures. The data were obtained from a, b).

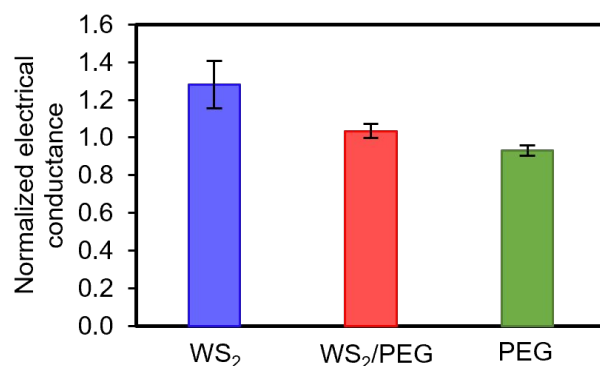

**Figure S3.** Conductance of pure WS<sub>2</sub>, WS<sub>2</sub>/PEG and PEG measured in DMEM (MCF-7 cell media). The values were normalized to DMEM conductance, and the error bars represent SEM from 3 independent experiments ( $n = 3$ ).

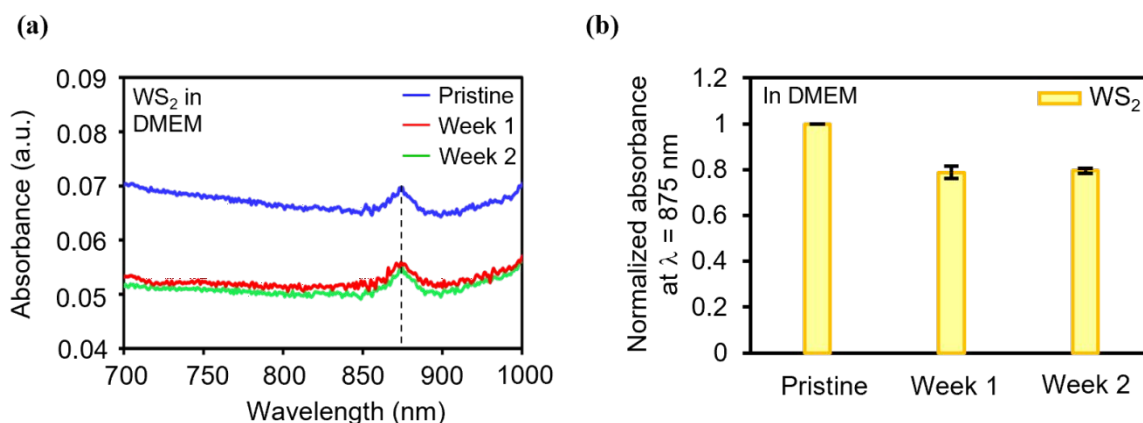

**Figure S4. a)** Absorbance spectra of pure WS<sub>2</sub> stored in DMEM for different weeks. **b)** Variation of the normalized absorbance at  $\lambda = 875$  nm for pure WS<sub>2</sub> stored in DMEM in different weeks.

Absorbance spectra with a similar behavior have been demonstrated by the pure transition metal dichalcogenide (TMD-) and TMD/PEG-based nanostructures utilized by other research groups (the absorbance spectra of TMD exhibit a strong absorbance, which was not affected by the PEG modification).<sup>1-3</sup> The nanostructures used in this work show a similar set of curves, which indicates that our results are similar.

The TMD/ BP nanostructures utilized by other research groups demonstrate absorbance spectra with a decrease in absorbance due to degradation.<sup>4-6</sup> A similar set of absorbance curves were obtained for the nanostructures used in this work, indicating that our studies disclose similar results.

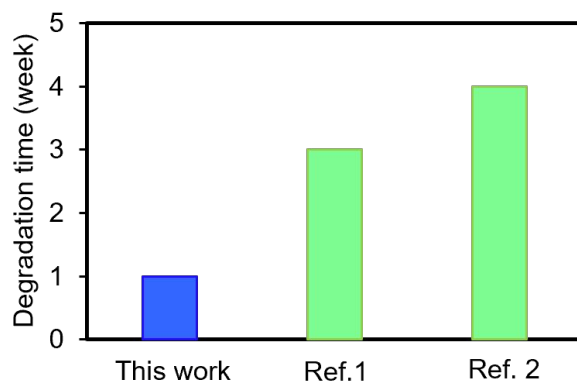

**Figure S5.** Comparison of the degradation time of WS<sub>2</sub> with that of current nanostructure-based systems in physiological media. The information of the references can be found in Table S4.

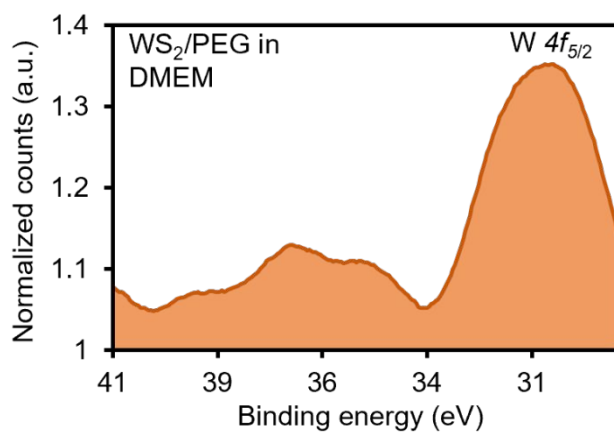

**Figure S6.** XPS spectra showing the binding energies of W 4f<sub>5/2</sub> of the WS<sub>2</sub>/PEG stored in DMEM for a week. The XPS counts were normalized to background.

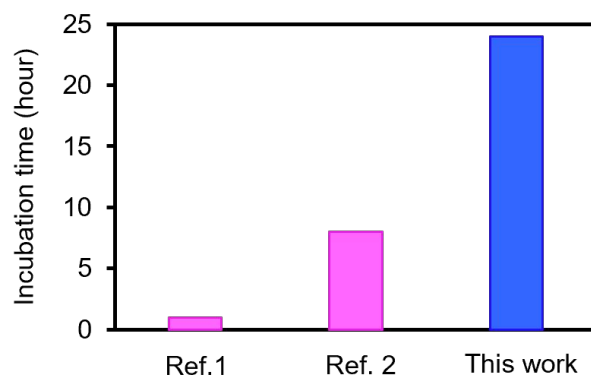

**Figure S7.** Comparison of the incubation time of WS<sub>2</sub>/PEG nanostructures with that of current thermal-based therapeutic methods and with the use of the time of incubation of nanostructures in cells before application of a stimulus as a measure of incubation time. The information of the references can be found in Table S5.

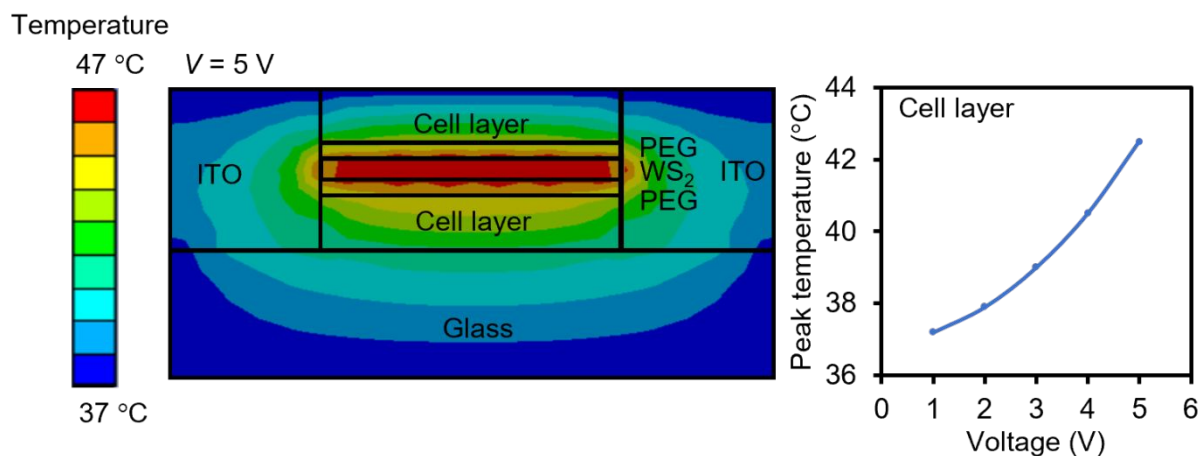

**Figure S8.** Thermal distribution of a cell-layer/nanostructure model. WS<sub>2</sub>/PEG was inserted in the middle of the cell layer, and a square-wave single-pulse was applied. The cell and material structures were constructed on an ITO-on-glass subsystem.



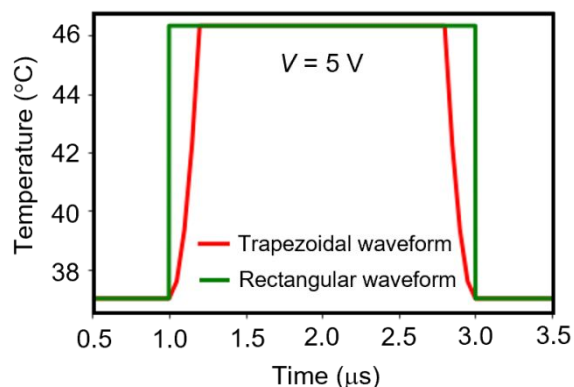

**Figure S9.** Thermal profiles of the WS<sub>2</sub>/PEG-nanostructure AC-pulse model for different types of waveforms. Two different waveforms were applied to the cell-layer/nanostructure model.

## References

- (1) Cheng, L.; Liu, J.; Gu, X.; Gong, H.; Shi, X.; Liu, T.; Wang, C.; Wang, X.; Liu, G.; Xing, H.; Bu, W.; Sun, B.; Liu, Z. PEGylated WS<sub>2</sub> Nanosheets as a Multifunctional Theranostic Agent for in Vivo Dual-Modal CT/Photoacoustic Imaging Guided Photothermal Therapy. *Adv. Mater.* **2014**, *26* (12), 1886–1893. DOI: 10.1002/adma.201304497.
- (2) Liu, T.; Wang, C.; Gu, X.; Gong, H.; Cheng, L.; Shi, X.; Feng, L.; Sun, B.; Liu, Z. Drug Delivery with PEGylated MoS<sub>2</sub> Nano-Sheets for Combined Photothermal and Chemotherapy of Cancer. *Adv. Mater.* **2014**, *26* (21), 3433–3440. DOI: 10.1002/adma.201305256.
- (3) Feng, W.; Chen, L.; Qin, M.; Zhou, X.; Zhang, Q.; Miao, Y.; Qiu, K.; Zhang, Y.; He, C. Flower-like PEGylated MoS<sub>2</sub> Nanoflakes for near-Infrared Photothermal Cancer Therapy. *Sci. Rep.* **2015**, *5* (1), 17422. DOI: 10.1038/srep17422.
- (4) Shao, J.; Xie, H.; Huang, H.; Li, Z.; Sun, Z.; Xu, Y.; Xiao, Q.; Yu, X.-F.; Zhao, Y.; Zhang, H.; Wang, H.; Chu, P. K. Biodegradable Black Phosphorus-Based Nanospheres for in Vivo Photothermal Cancer Therapy. *Nat. Commun.* **2016**, *7*, 12967. DOI: 10.1038/ncomms12967.
- (5) Hu, K.; Xie, L.; Zhang, Y.; Hanyu, M.; Yang, Z.; Nagatsu, K.; Suzuki, H.; Ouyang, J.; Ji, X.; Wei, J.; Xu, H.; Farokhzad, O. C.; Liang, S. H.; Wang, L.; Tao, W.; Zhang, M.-R. Marriage of Black Phosphorus and Cu<sup>2+</sup> as Effective Photothermal Agents for PET-Guided Combination Cancer Therapy. *Nat. Commun.* **2020**, *11* (1), 2778. DOI: 10.1038/s41467-020-16513-0.
- (6) Hao, J.; Song, G.; Liu, T.; Yi, X.; Yang, K.; Cheng, L.; Liu, Z. In Vivo Long-Term Biodistribution, Excretion, and Toxicology of PEGylated Transition-Metal Dichalcogenides MS<sub>2</sub> (M = Mo, W, Ti) Nanosheets. *Adv. Sci.* **2016**, *4* (1), 1600160. DOI: 10.1002/advs.201600160.
